# Supplementary material
Source: PubMed Central journal article supplement (PMC4169543)

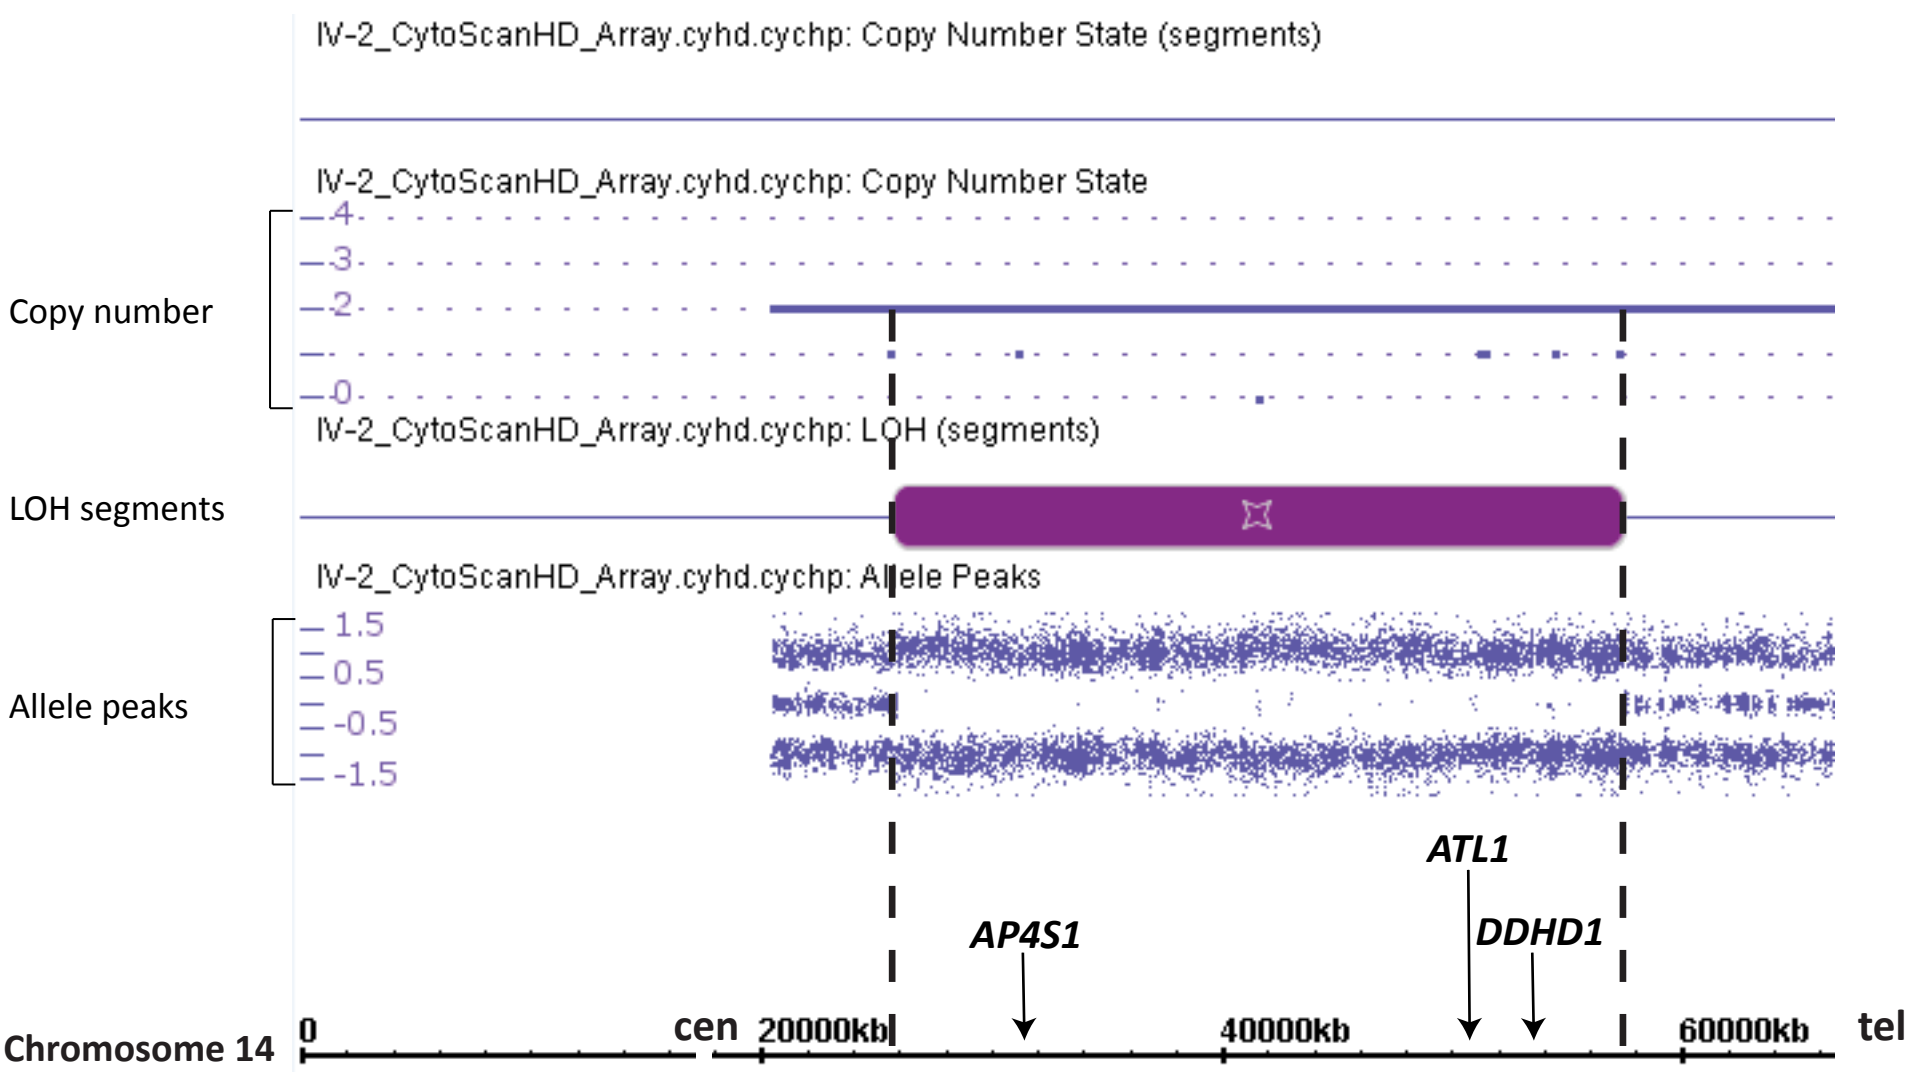

Supplement: ejhg20145x1.pdf [file ejhg20145x1.pdf]
